# Supplementary material
Source: bioRxiv or medRxiv preprint supplement (https://www.biorxiv.org/highwire/filestream/1440/field_highwire_adjunct_files/0/005736-1.pdf)
Supplement: Supplementary file [file 005736-1.pdf]

# Phylogenetic Identification and Functional Characterization of Orthologs and Paralogs across Human, Mouse, Fly, and Worm – Supplementary Material

Yi-Chieh Wu, Mukul S. Bansal, Matthew D. Rasmussen, Javier Herrero, Manolis Kellis

## Supplemental Figures

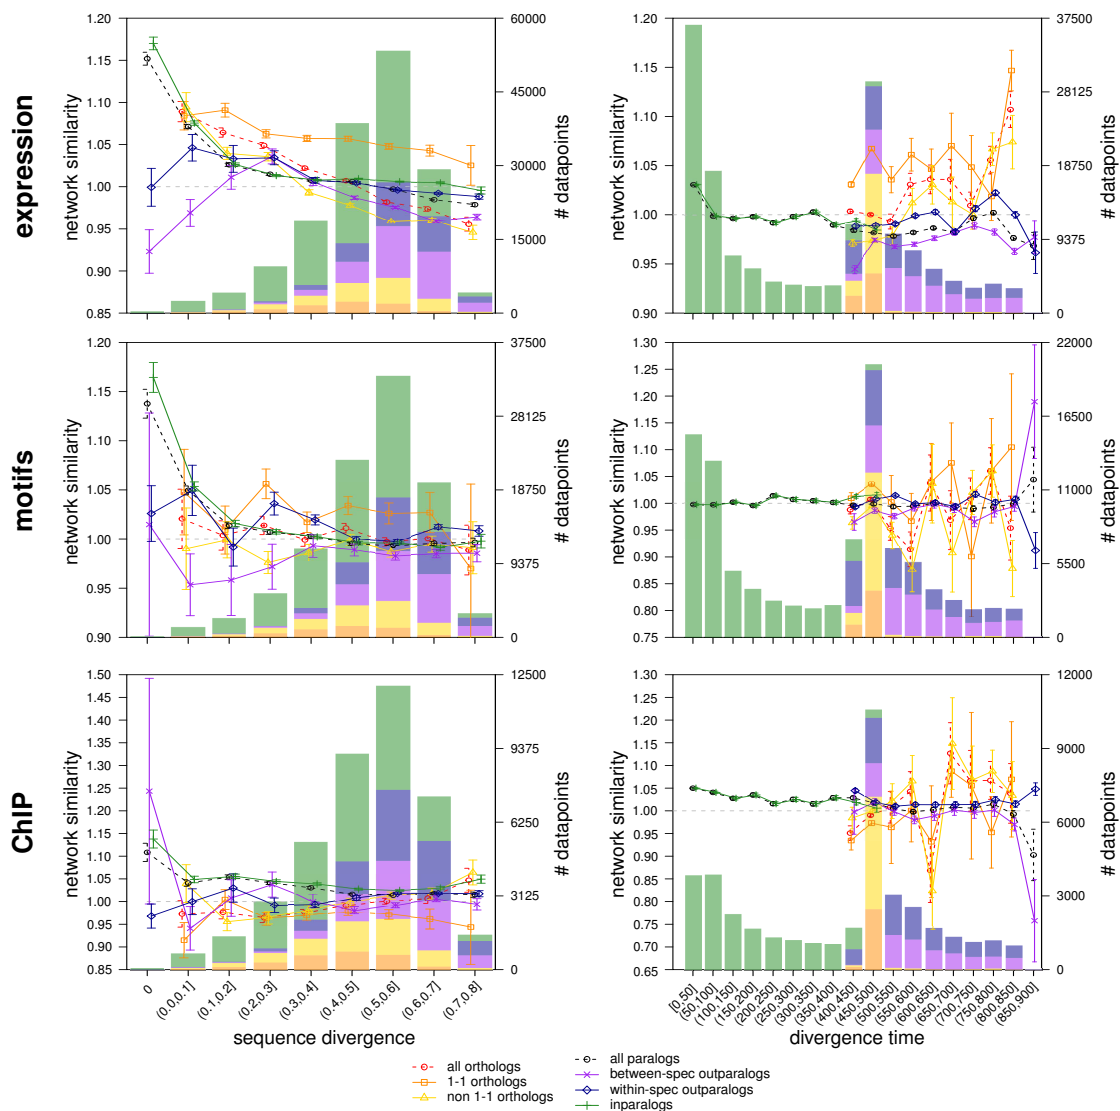

Figure S1. Network similarity of different types of homologs. See Figure 3 for details.

## Supplemental Tables

**Table S1. Species tree parameters.**

| species                                | parameter <sup>a</sup> | value        | reference                                        |
|----------------------------------------|------------------------|--------------|--------------------------------------------------|
| human–mouse                            | $t$                    | 75           | Mouse Genome Sequencing Consortium et al. (2002) |
| human                                  | $N_e$                  | 10,400       | Yu et al. (2004)                                 |
| human                                  | $g$                    | 20           | Rasmussen and Kellis (2012)                      |
| mouse                                  | $N_e$                  | 460,000      | Piganeau and Eyre-Walker (2009)                  |
| mouse                                  | $g$                    | 0.5          | Piganeau and Eyre-Walker (2009)                  |
| fly <sup>b</sup>                       | topology               | -            | Tamura et al. (2004)                             |
| fly root                               | $t$                    | 62           | Tamura et al. (2004)                             |
| <i>D. melanogaster</i>                 | $N_e$                  | $10^7$       | Shapiro et al. (2007)                            |
| <i>D. melanogaster</i>                 | $g$                    | 0.1          | Sawyer and Hartl (1992)                          |
| worm <sup>c</sup>                      | topology               | -            | Kiontke et al. (2004)                            |
| <i>C. elegans</i> – <i>C. briggsae</i> | $t$                    | 18.6         | Cutter (2008)                                    |
| <i>C. elegans</i>                      | $N_e$                  | 50,000       | Rockman and Kruglyak (2009)                      |
| <i>C. remanei</i>                      | $N_e$                  | $10^6$       | Hillier et al. (2007)                            |
| <i>C. elegans</i>                      | $g$                    | 1/6          | Cutter (2008)                                    |
| outgroup                               |                        |              |                                                  |
| <i>S. cerevisiae</i> <sup>d</sup>      | $N_e$                  | $10^7$       | Tsai et al. (2008)                               |
| <i>S. cerevisiae</i> <sup>d</sup>      | $g$                    | 0.9          | Rasmussen and Kellis (2012)                      |
| all species                            | $\lambda, \mu$         | 0.002, 0.002 | See footnote <sup>e</sup>                        |

<sup>a</sup>  $t$ : divergence time (myr);  $N_e$ : effective population size;  $g$ : generation time (yr);  $\lambda, \mu$ : duplication, loss rate (events/site/myr)

<sup>b</sup> Parameters were assumed to be the same across all fly species.

<sup>c</sup> Population size for *C. elegans* was propagated to other hermaphroditic species (*C. briggsae*), and population size for *C. remanei* was propagated to other dioecious species (*C. brenneri*, *C. japonica*). Generation time was assumed to be the same across all worm species.

<sup>d</sup> Parameters were estimated from *S. paradoxus*.

<sup>e</sup> Parameters were estimated using the procedure of Rasmussen and Kellis (2011).

<sup>f</sup> For branches outside of the major clades, population size and generation time were calculated by taking the average of the respective parameter for its children.

**Table S2. Statistics for the different homolog subtypes.**

| homolog class               | # of homologs <sup>a</sup> | mean <sup>b</sup> | median <sup>b</sup> | $p$ -value <sup>c</sup>  | $\rho^c$ |
|-----------------------------|----------------------------|-------------------|---------------------|--------------------------|----------|
| all orthologs               | 23,518                     | 1.010             | 0.990               | $3.579 \times 10^{-32}$  | -0.077   |
| one-to-one orthologs        | 7,769                      | 1.039             | 1.021               | $3.023 \times 10^{-1}$   | -0.012   |
| non-one-to-one orthologs    | 15,749                     | 0.995             | 0.975               | $1.495 \times 10^{-10}$  | -0.051   |
| all paralogs                | 140,191                    | 1.006             | 1.003               | $2.515 \times 10^{-233}$ | -0.087   |
| inparalogs                  | 88,186                     | 1.013             | 1.013               | $2.033 \times 10^{-66}$  | -0.058   |
| within-species outparalogs  | 23,422                     | 1.008             | 1.008               | $2.296 \times 10^{-5}$   | -0.028   |
| between-species outparalogs | 28,583                     | 0.981             | 0.965               | $9.864 \times 10^{-9}$   | -0.034   |

<sup>a</sup> Only homologs with sequence divergence  $\leq 0.8$  are retained.

<sup>b</sup> Mean and median network similarity.

<sup>c</sup> Correlation test, with  $p$ -value and Spearman's correlation coefficient shown.

**Table S3. Significance test for difference in network similarity between orthologs and paralogs, binned by sequence divergence.**

| sequence divergence | % difference <sup>a</sup> | $p$ -value <sub>orthologs&gt;paralogs</sub> <sup>b</sup> | $p$ -value <sub>orthologs&lt;paralogs</sub> <sup>b</sup> |
|---------------------|---------------------------|----------------------------------------------------------|----------------------------------------------------------|
| [0.0, 0.1]          | 4.672 [6.706]             | 1                                                        | $1.342 \times 10^{-6}$                                   |
| [0.1, 0.2]          | 0.255 [1.041]             | 0.861                                                    | $1.394 \times 10^{-1}$                                   |
| [0.2, 0.3]          | 1.224 [0.606]             | 0.155                                                    | $8.452 \times 10^{-1}$                                   |
| [0.3, 0.4]          | 0.163 [2.195]             | 1                                                        | $3.073 \times 10^{-6}$                                   |
| [0.4, 0.5]          | 0.590 [1.047]             | 0.966                                                    | $3.382 \times 10^{-2}$                                   |
| [0.5, 0.6]          | 0.172 [1.221]             | 1                                                        | $3.339 \times 10^{-4}$                                   |
| [0.6, 0.7]          | 0.024 [1.227]             | 0.996                                                    | $4.296 \times 10^{-3}$                                   |
| [0.7, 0.8]          | 0.103 [1.712]             | 0.888                                                    | $1.119 \times 10^{-1}$                                   |

<sup>a</sup> Percent difference between orthologs and paralogs in mean [median] network similarity.

<sup>b</sup>  $P$ -values based on one-tailed Mann-Whitney tests.

**Table S4. Significance test for difference in network similarity between orthologs and paralogs, binned by divergence time.**

| divergence time | % difference <sup>a</sup> | $p$ -value <sub>orthologs&gt;paralogs</sub> <sup>b</sup> | $p$ -value <sub>orthologs&lt;paralogs</sub> <sup>b</sup> |
|-----------------|---------------------------|----------------------------------------------------------|----------------------------------------------------------|
| [400, 450]      | 1.520 [0.406]             | $1.570 \times 10^{-6}$                                   | 1                                                        |
| [450, 500]      | 1.492 [0.116]             | $3.757 \times 10^{-9}$                                   | 1                                                        |
| [500, 550]      | 1.526 [0.630]             | $2.978 \times 10^{-2}$                                   | 0.970                                                    |
| [550, 600]      | 4.751 [2.935]             | $3.561 \times 10^{-6}$                                   | 1                                                        |
| [600, 650]      | 5.207 [2.528]             | $3.592 \times 10^{-4}$                                   | 1                                                        |
| [650, 700]      | 5.745 [4.480]             | $1.057 \times 10^{-3}$                                   | 0.999                                                    |
| [700, 750]      | 3.728 [2.587]             | $2.074 \times 10^{-4}$                                   | 1                                                        |
| [750, 800]      | 1.620 [2.416]             | $9.773 \times 10^{-1}$                                   | 0.023                                                    |
| [800, 850]      | 5.471 [5.631]             | $3.461 \times 10^{-4}$                                   | 1                                                        |

<sup>a</sup> Percent difference between orthologs and paralogs in mean [median] network similarity.

<sup>b</sup>  $P$ -values based on one-tailed Mann-Whitney tests.

**Table S5. Significance test for difference in network similarity between homolog subtypes.<sup>a</sup>**

|                          | 1-1 orthologs | non 1-1 orthologs | inparalogs    | ws outparalogs | bs outparalogs |
|--------------------------|---------------|-------------------|---------------|----------------|----------------|
| <b>1-1 orthologs</b>     | –             | 4.335 [4.647]     | 2.521 [0.834] | 3.083 [1.320]  | 5.698 [5.726]  |
| <b>non 1-1 orthologs</b> |               | –                 | 1.815 [3.813] | 1.252 [3.328]  | 1.364 [1.080]  |
| <b>inparalogs</b>        |               |                   | –             | 0.563 [0.486]  | 3.179 [4.893]  |
| <b>ws outparalogs</b>    |               |                   |               | –              | 2.616 [4.407]  |
| <b>bs outparalogs</b>    |               |                   |               |                | –              |

<sup>a</sup> In the first row of each cell are percent differences in mean [median] network similarity. In the second row of each cell are  $p$ -values based on one-tailed Mann-Whitney tests, with the alternative hypothesis shown in parenthesis; that is, > (<) tests the alternative hypothesis that the row header is more (less) similar than the column header.

## References

- Cutter A. D. 2008. Divergence times in *Caenorhabditis* and *Drosophila* inferred from direct estimates of the neutral mutation rate. *Mol Biol Evol* **25**:778–786.
- Hillier D. W, Miller R. D, Baird S. E, Chinwalla A, Fulton L. A, Koboldt D. C and Waterston R. H. 2007. Comparison of *C. elegans* and *C. briggsae* genome sequences reveals extensive conservation of chromosome organization and synteny. *PLoS Biol* **5**:e167.
- Kiontke K, Gavin N. P, Raynes Y, Roehrig C, Piano F and Fitch D. H. A. 2004. *Caenorhabditis* phylogeny predicts convergence of hermaphroditism and extensive intron loss. *PNAS* **101**:9003–9008.
- Mouse Genome Sequencing Consortium, Chinwalla A. T, Cook L. L, Delehaunty K. D, et al. (319 co-authors). 2002. Initial sequencing and comparative analysis of the mouse genome. *Nature* **420**:520–562.
- Piganeau G and Eyre-Walker A. 2009. Evidence for variation in the effective population size of animal mitochondrial dna. *PLoS One* **4**:e4396.
- Rasmussen M. D and Kellis M. 2011. A Bayesian approach for fast and accurate gene tree reconstruction. *Mol Biol Evol* **28**:273–290.
- Rasmussen M. D and Kellis M. 2012. Unified modeling of gene duplication, loss, and coalescence using a locus tree. *Genome Res* **22**:755–765.
- Rockman M. V and Kruglyak L. 2009. Recombinational landscape and population genomics of *Caenorhabditis Elegans*. *PLoS Genet* **5**:e1000419.
- Sawyer S. A and Hartl D. L. 1992. Population genetics of polymorphism and divergence. *Genetics* **132**:1161–1176.
- Shapiro J. A, Huang W, Zhang C, Hubisz M. J, et al. (13 co-authors). 2007. Adaptive genic evolution in the *Drosophila* genomes. *PNAS* **104**:2271–2276.
- Tamura K, Subramanian S and Kumar S. 2004. Temporal patterns of fruit fly (*Drosophila*) evolution revealed by mutation clocks. *Mol Biol Evol* **21**:36–44.
- Tsai I. J, Bensasson D, Burt A and Koufopanou V. 2008. Population genomics of the wild yeast *saccharomyces paradoxus*: Quantifying the life cycle. *PNAS* **105**:4957–4962.
- Yu N, Jensen-Seaman M. I, Chemnick L, Ryder O and Li W.-H. 2004. Nucleotide diversity in gorillas. *Genetics* **166**:1375–1383.
